# Supplementary material
Source: Springer Nature journal article supplement (https://www.springermedizin.de/resource/supplementary/12943_2010_781_MOESM7_ESM.PDF/9554810)
Supplement: MOESM7 [file 9554810]

Table S4: Transcription Factor binding sites are found in the promoters of both the *sox1* and the *stat3* promoters

| Detailed Family Information                  | Evidence            | Matrix |
|----------------------------------------------|---------------------|--------|
| GATA binding factors                         | aagaGATTaccac       | 1      |
| NeuroD, Beta2, HLH domain                    | gaagcacCTGCaa       | 1      |
| NKX homeodomain factors                      | aatctTAATtgctggggaa | 1      |
| NKX homeodomain factors                      | ggcttcAAGTgttttttt  | 1      |
| RNA polymerase II transcription factor IIB   | ccgCGCC             | 1      |
| TALE homeodomain class recognizing TG motifs | acattcttGTCAaaagg   | 1      |
| TCF11 transcription factor                   | GTCAtt              | 1      |
| Zinc finger transcription factor RU49        | aAGTAcc             | 1      |
